# Supplementary material for: Mn4+-doped rare-earth-free Mg4Nb2O9 phosphors for optical temperature sensing
Source: Royal Society of Chemistry journal article supplement (doi:10.1039/d4dt01975j), 2024-01-01
Supplement: d4dt01975j1.pdf [file d4dt01975j1.pdf]

## **Electronic supplementary information (ESI)**

### **Mn<sup>4+</sup>-doped rare-earth-free Mg<sub>4</sub>Nb<sub>2</sub>O<sub>9</sub> phosphors for optical temperature sensing**

Weiwei Xiang and Jae Su Yu\*

*Department of Electronic and Information Convergence Engineering, Institute for Wearable Convergence Electronics, Kyung Hee University, Yongin-si, Gyeonggi-do, 17104, Republic of Korea*

*Corresponding author: E-mail: [jsyu@khu.ac.kr](mailto:jsyu@khu.ac.kr) (J. S. Yu)*

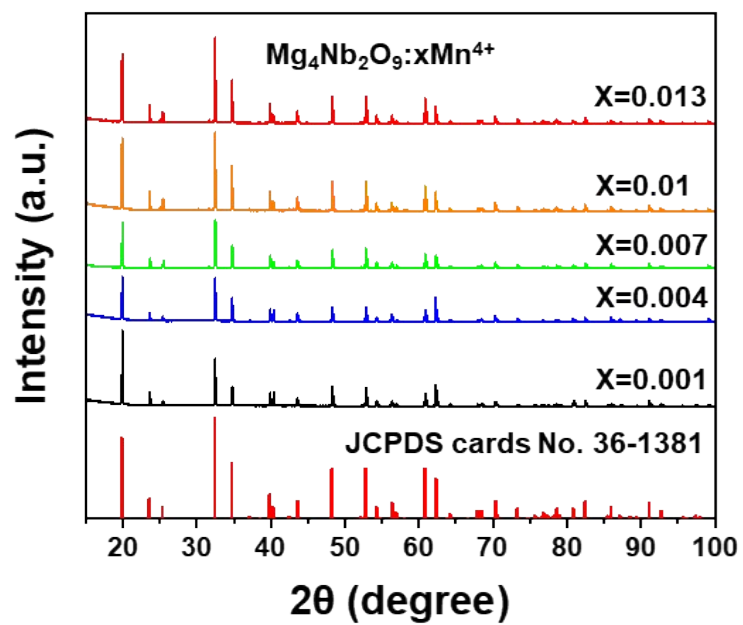

**Fig. S1.** XRD patterns of  $\text{Mg}_4\text{Nb}_2\text{O}_9:\text{xMn}^{4+}$  phosphors (x = 0.001, 0.004, 0.007, 0.01, and 0.013, in mol) and standard  $\text{Mg}_4\text{Nb}_2\text{O}_9$  data.

**Table S1.** XRD refinement results of the  $\text{Mg}_4\text{Nb}_2\text{O}_9:0.001\text{Mn}^{4+}$  and  $\text{Mg}_4\text{Nb}_2\text{O}_9:0.004\text{Mn}^{4+}$  phosphors.

|                     | $\text{Mg}_4\text{Nb}_2\text{O}_9:0.001\text{Mn}^{4+}$ | $\text{Mg}_4\text{Nb}_2\text{O}_9:0.004\text{Mn}^{4+}$ | $\text{Mg}_4\text{Nb}_2\text{O}_9:0.013\text{Mn}^{4+}$ |
|---------------------|--------------------------------------------------------|--------------------------------------------------------|--------------------------------------------------------|
| Space group         | $\text{P}\bar{3}\text{c}1$                             | $\text{P}\bar{3}\text{c}1$                             | $\text{P}\bar{3}\text{c}1$                             |
| a (Å)               | 5.1632                                                 | 5.16289                                                | 5.1584                                                 |
| b (Å)               | 5.1632                                                 | 5.16289                                                | 5.1584                                                 |
| c (Å)               | 14.03034                                               | 14.02987                                               | 14.01701                                               |
| $\alpha$ (°)        | 90                                                     | 90                                                     | 90                                                     |
| $\beta$ (°)         | 90                                                     | 90                                                     | 90                                                     |
| $\gamma$ (°)        | 120                                                    | 120                                                    | 120                                                    |
| V (Å <sup>3</sup> ) | 323.919                                                | 323.869                                                | 323.011                                                |
| $R_{\text{wp}}$     | 9.62%                                                  | 9.27%                                                  | 11.2%                                                  |
| $R_{\text{p}}$      | 6.66%                                                  | 6.17%                                                  | 8.23%                                                  |
| $\chi^2$            | 1.87                                                   | 1.86                                                   | 1.2                                                    |

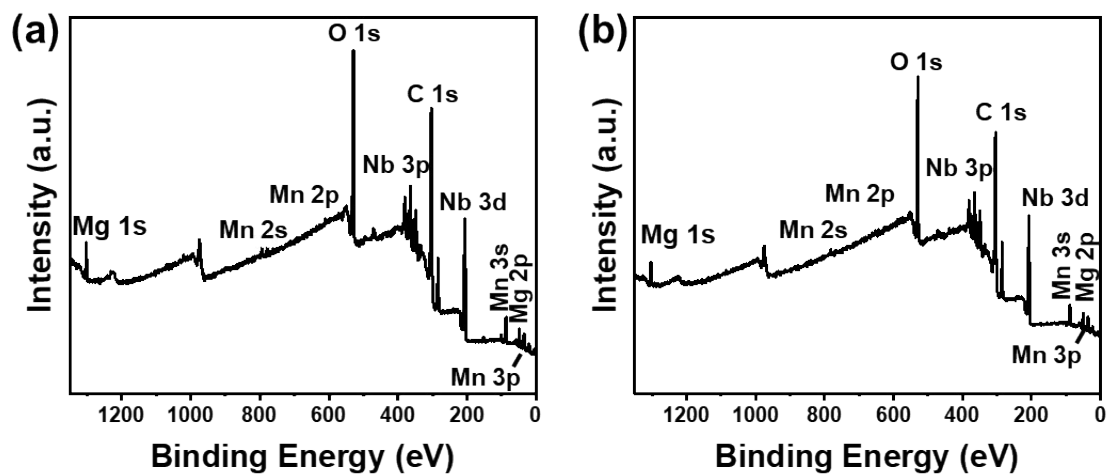

**Fig. S2.** Total XPS survey scan spectra of the (a)  $\text{Mg}_4\text{Nb}_2\text{O}_9:0.001\text{Mn}^{4+}$  and  $\text{Mg}_4\text{Nb}_2\text{O}_9:0.004\text{Mn}^{4+}$  phosphors.

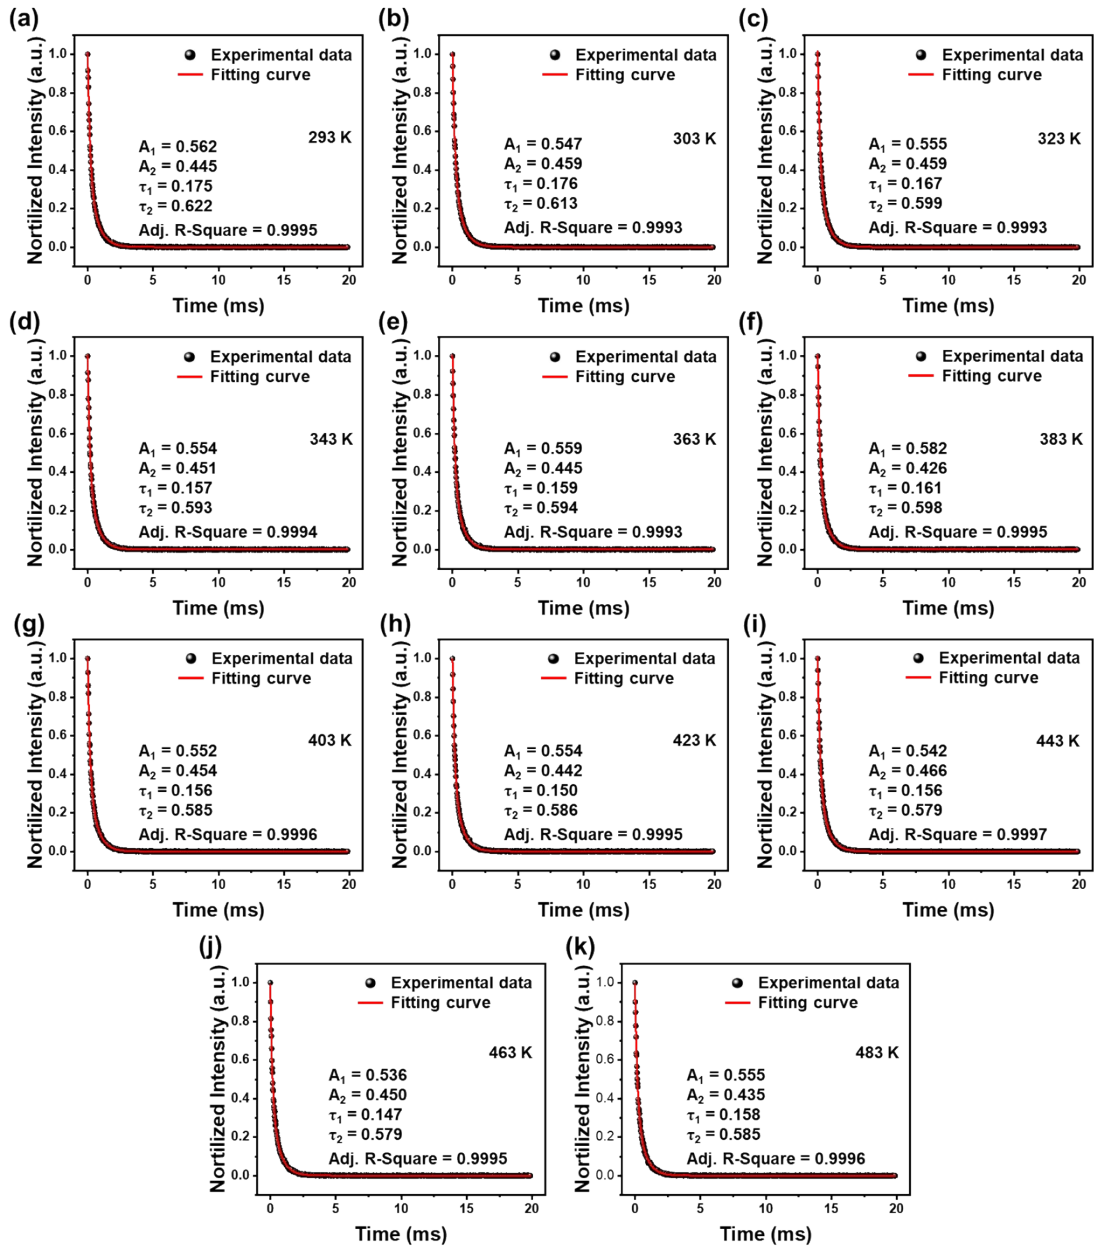

Fig. S3. Decay curves of the  $\text{Mg}_4\text{Nb}_2\text{O}_9:0.004\text{Mn}^{4+}$  phosphor at different temperatures.

**Table S2.** Comparison of  $S_R$  between  $Mg_4Nb_2O_9:Mn^{4+}$  and several lifetime-based temperature sensing phosphor materials.

| Sensing materials                   | Temperature | Maximum $S_R$ (%K <sup>-1</sup> ) | Ref.      |
|-------------------------------------|-------------|-----------------------------------|-----------|
| $SrAl_2Si_2O_8:Eu^{2+}/Eu^{3+}$     | 303-583 K   | 0.22                              | 1         |
| $Ca_3Y_2Ge_3O_{12}:Bi^{3+}/Eu^{3+}$ | 297.8-480 K | 0.338                             | 2         |
| $YF_3:Nd^{3+}, Yb^{3+}$             | 100-320 K   | 0.31                              | 3         |
| $Ca_8ZnLa(PO_4)_7:Tb^{3+}, Eu^{3+}$ | 298-498 K   | 0.34                              | 4         |
| $Mg_4Nb_2O_9:Mn^{4+}$               | 293-483 K   | 0.48                              | This work |

## References

1. J. Xue, M. Song, H. M. Noh, S. H. Park, B. C. Choi, J. H. Kim, J. H. Jeong, P. Du, *J. Alloys Compd.*, 2020, **843**, 155858.
2. H. Zhang, M. Liao, Y. Jiao, W. Li, H. Dong, Y. Fang, W. Gao, L. Hu, *Ceram. Int.*, 2022, **48**, 33072-33081.
3. M.S. Pudovkin, A.K. Ginkel, O.A. Morozov, A.G. Kiiamov, M.D. Kuznetsov, *J. Lumin.*, 2022, **249**,119037.
4. L. Li, X. Tang, Z. Wu, Y. Zheng, S. Jiang, X. Tang, G. Xiang, X. Zhou, *J. Alloys Compd.*, 2019, **780**,266-275.
